# Supplementary material
Source: PubMed Central journal article supplement (PMC3907262)
Supplement: mmc1.pdf [file mmc1.pdf]

# Supporting Material for

## Switching of swimming modes in *Magnetospirillum gryphiswaldense*

M. Reufer<sup>1</sup>, R. Besseling<sup>1</sup>, J. Schwarz-Linek<sup>1</sup>, V.A. Martinez<sup>1</sup>, A.N. Morozov<sup>1</sup>, J. Arlt<sup>1</sup>,  
D. Trubitsyn<sup>2</sup>, F.B. Ward<sup>2</sup>, W. C. K. Poon<sup>1</sup>

<sup>1</sup> SUPA and COSMIC, School of Physics & Astronomy, The University of Edinburgh, King's Buildings, Edinburgh EH9 3JZ, United Kingdom

<sup>2</sup> Institute of Cell Biology, The University of Edinburgh, King's Buildings, Edinburgh EH9 3JR, United Kingdom

---

### Supporting Figures

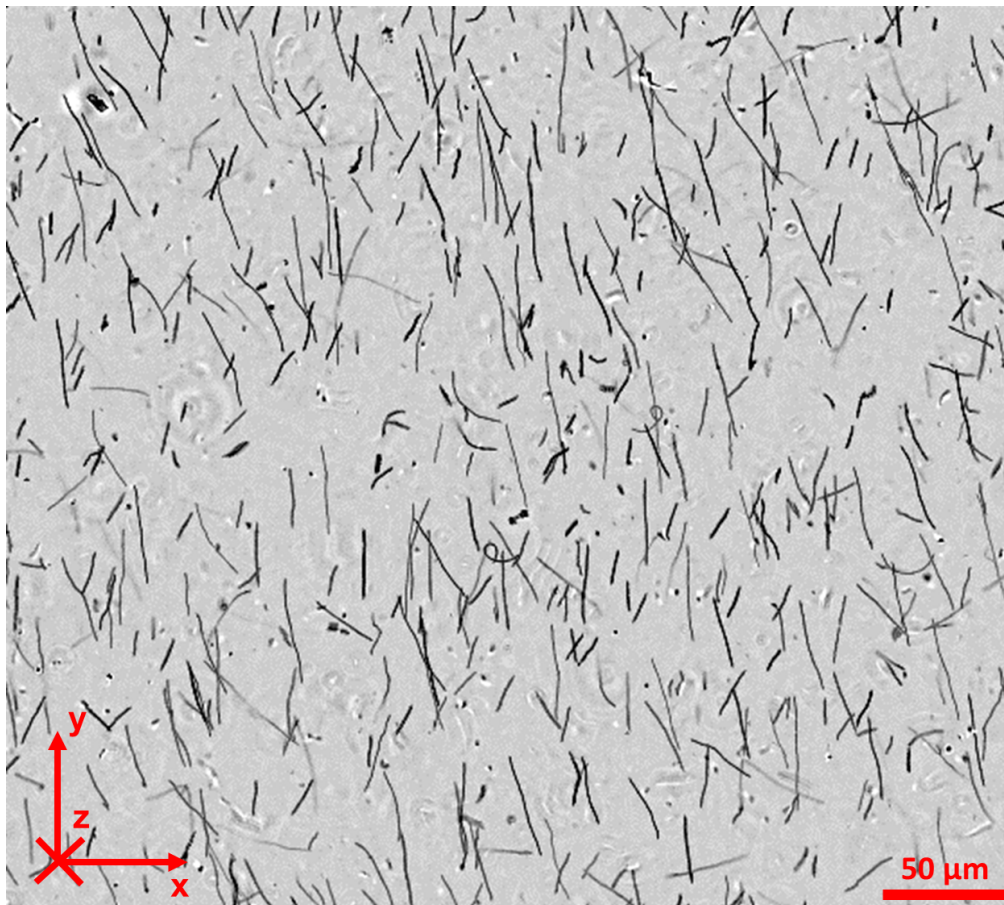

Figure S1: Superposition of images recorded during 1 s of *M. gryphiswaldense* swimming along the bottom of the observation chamber. Each line represents a single cell. The dots are non-motile cells. The horizontal and vertical magnetic field are 1.4 mT and 0.86 mT, respectively.

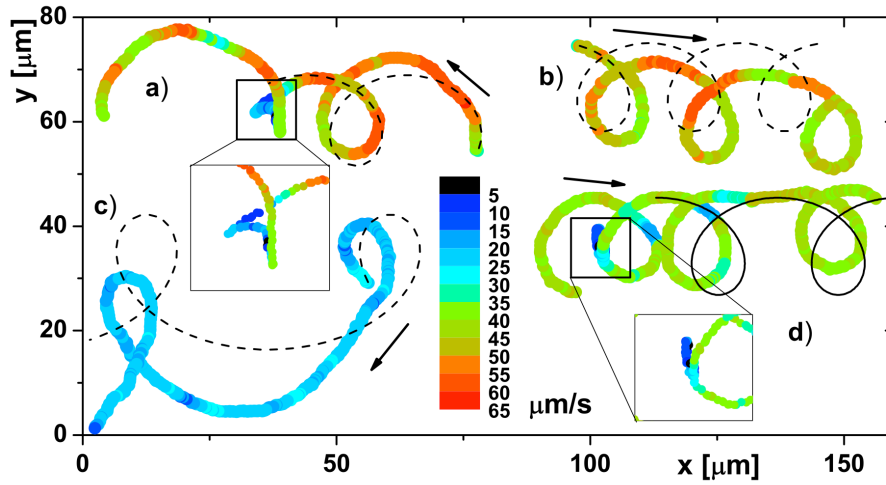

Figure S2: Trajectories of individual cells swimming in the indicated (arrow) direction in a horizontal field of  $B_y = -1.5$  mT recorded under conditions summarized in Table S1. The color code corresponds to the absolute swimming speed. The dashed lines show the calculated trajectories with the best-fit parameters summarized in Table S1. Trajectory a) shows a cell swimming  $SS^{\text{fast}}$ , then reversing to  $NS^{\text{slow}}$  for a short stretch (see inset) before swimming again  $SS^{\text{fast}}$ . Note, that the averaging over 0.2 s to calculate the absolute swimming speed leads to the impression that the cell slows down before switching to the slower swimming speed. Trajectory b) shows a cell swimming  $SS^{\text{fast}}$ . Trajectory c) shows a cell swimming  $NS^{\text{slow}}$ . Trajectory d) shows a cell swimming  $SS^{\text{fast}}$ , then switching briefly to  $SS^{\text{slow}}$  that leads to an almost straight trajectory (see inset), then reversing to  $NS^{\text{slow}}$  to swim back to the first mode switching point and reversing again to continue a looped trajectory in  $SS^{\text{fast}}$  mode. Note that the sense of the curvatures of all the trajectories correspond to what Fig. 3 shows for straight swimmers.

|          | z position | $B_z$ [mT] | p     | $\omega$ [1/s] | $v$ [ $\mu\text{m/s}$ ] |
|----------|------------|------------|-------|----------------|-------------------------|
| Track a) | bottom     | 1.4        | 0.60  | -7.1           | 53                      |
| Track b) | top        | -1.4       | -0.57 | 6.6            | 49                      |
| Track c) | bottom     | -1.8       | 0.60  | 3.2            | 21                      |
| Track d) | top        | -1.4       | -0.65 | 5.1            | 40                      |

Table S1: Recording parameters and best fit parameters for tracks shown in Fig. S2
